# Supplementary material
Source: Springer Nature journal article supplement (https://www.springermedizin.de/resource/supplementary/13054_2013_2231_MOESM6_ESM.pdf/9713856)

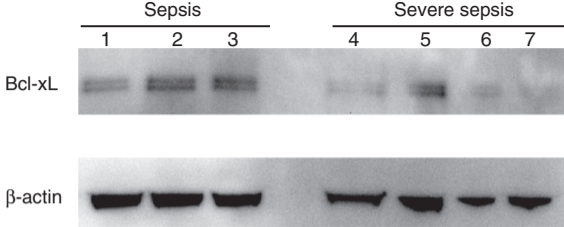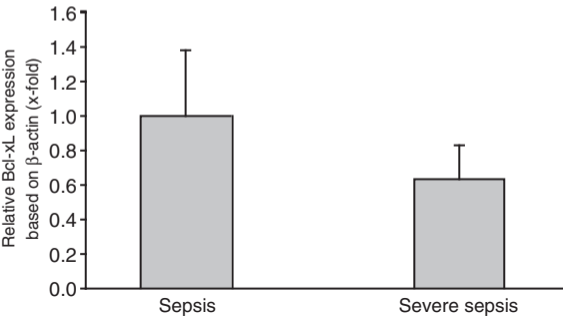

Supplement: MOESM6 [file 9713856]
